# Supplementary material for: Identification of hub genes and small molecule therapeutic drugs related to breast cancer with comprehensive bioinformatics analysis
Source: PeerJ journal article supplement (doi:10.7717/peerj.9946), 2020-09-29

A

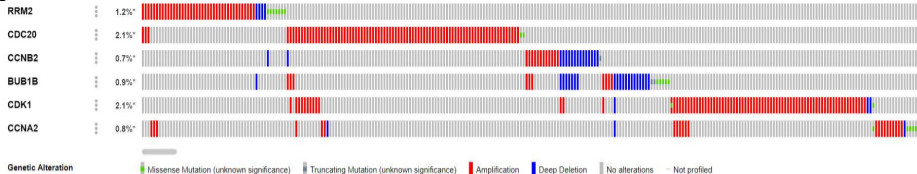

B

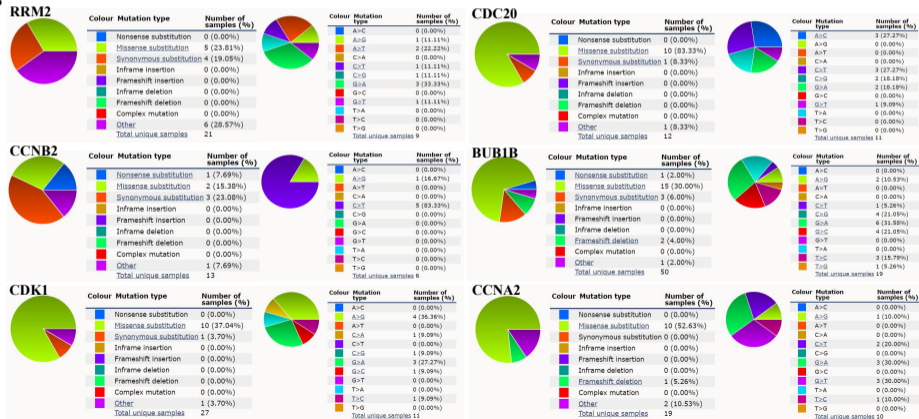

Supplement: Figure_S4.pdf [file Figure_S4.pdf]
