# Supplementary material for: Identification of hub genes and small molecule therapeutic drugs related to breast cancer with comprehensive bioinformatics analysis
Source: PeerJ journal article supplement (doi:10.7717/peerj.9946), 2020-09-29

**A**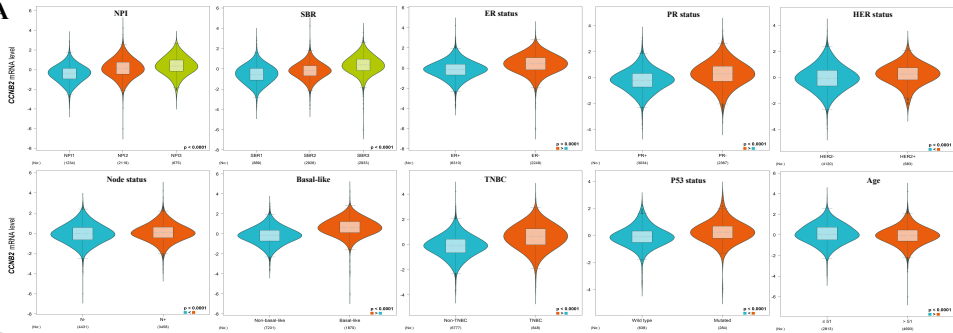**B**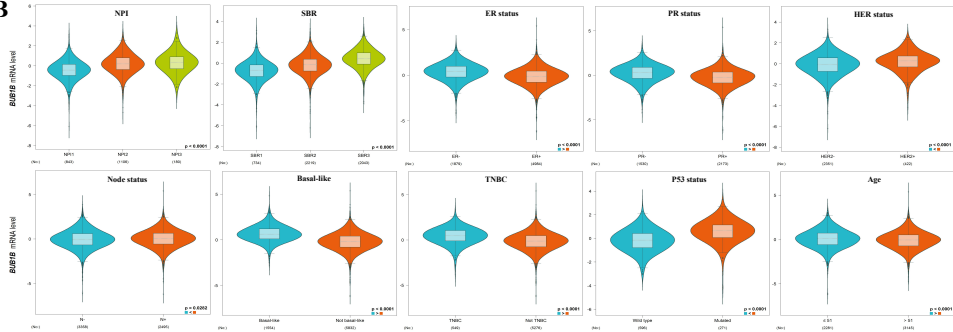

Supplement: Figure_S6.pdf [file Figure_S6.pdf]
