# Supplementary material for: Identification of hub genes and small molecule therapeutic drugs related to breast cancer with comprehensive bioinformatics analysis
Source: PubMed Central journal article supplement (PMC7556247; doi:10.7717/peerj.9946), 2020-09-29

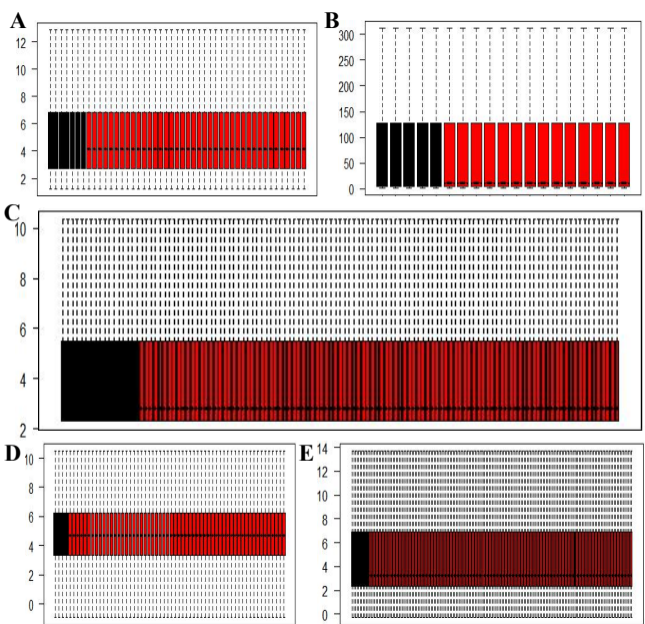

Supplement: peerj-08-9946-s001.pdf [file peerj-08-9946-s001.pdf]
